# Supplementary material for: Factors associated with vegetable and fruit intake among adolescents with overweight and obesity in Selangor from 2020 to 2021
Source: Front Public Health. 2025 Jul 16;13:1539506. doi: 10.3389/fpubh.2025.1539506 (PMC12307182; doi:10.3389/fpubh.2025.1539506)
Supplement: Supplementary file 1 [file Data_Sheet_1.xlsx]

## Sheet: Sheet 1
Age	Gender	Ethnicity	Parents_education	Household_income	BMI_for_age	Vegetables_serving	Fruits_serving	Vegetables_frequency	Fruits_frequency	Knowledge_vegetables	Knowledge_fruits	Attitude	Liking	Self_efficacy	Intention	Habit	Mum_modelling	Dad_modelling	Parents_modelling	Peer_modelling	Mum_encourage	Dad_encourage	Parents_encourage	Demand	Allow	Home_availability_1	Home_availability_2	Home_availability_3	Home_availability	School_availability	FriendsHouse_availability	LeisurePlaces_availability
16	2	3	3	2	4	4	5	3	3	2	2	2	2	0	-1	0	1	0	0.5	0	0	1	0.5	2	-1	0	-1	1	0	-2	-2	-2
15	1	1	2	1	4	1	5	3	1	0	2	-1	1	2	2	-1	1	0	0.5	0	0	2	1	2	-2	-1	-2	2	-0.33	0	-1	-2
16	2	2	3	3	4	3	2	7	3	0	2	0	2	2	2	1	1	1	1	-2	-2	1	-0.5	-1	1	0	2	2	1.33	-2	0	-2
16	2	3	2	2	4	0	2	3	3	2	0	-2	1	2	1	2	-2	0	-1	2	2	2	2	-1	1	0	0	-1	-0.33	0	0	-2
16	1	1	3	3	4	1	2	3	3	0	0	0	1	0	2	2	1	2	1.5	1	2	1	1.5	-1	2	0	0	2	0.67	0	0	-2
15	2	2	1	2	4	2	2	3	7	0	0	1	0	1	2	0	1	2	1.5	2	2	0	1	0	0	2	0	2	1.33	0	0	-2
15	1	1	3	2	4	3	1	3	3	2	0	2	1	1	1	2	1	-1	0	2	2	-2	0	0	-1	1	-1	-2	-0.67	2	0	-2
13	2	2	2	1	4	5	1	5	1	0	2	1	2	1	0	0	1	1	1	0	0	0	0	0	-1	1	-1	0	0	0	1	-2
15	1	3	2	3	4	2	1	5	7	0	0	2	1	0	-2	1	1	0	0.5	-1	-1	-2	-1.5	-1	0	1	1	-1	0.33	1	-2	-1
15	2	2	3	2	4	2	1	3	5	0	0	0	2	-1	1	1	0	2	1	1	1	0	0.5	-1	2	-1	1	0	0	1	-2	-1
17	1	3	3	2	4	2	1	5	5	0	2	0	2	1	0	1	0	-2	-1	2	2	1	1.5	1	0	0	2	1	1	-2	-1	-1
15	2	2	3	2	4	1	0	7	5	0	0	2	0	0	0	1	1	2	1.5	1	1	1	1	1	0	-1	-1	0	-0.67	1	0	-1
13	2	3	2	1	4	5	4	5	5	0	0	1	1	1	2	2	2	0	1	1	1	2	1.5	2	1	0	2	2	1.33	1	0	-1
14	1	2	2	2	4	2	3	3	3	0	0	0	1	1	1	0	0	-1	-0.5	2	2	2	2	0	-2	2	1	0	1	-1	1	-1
16	2	2	2	1	4	2	3	3	5	0	0	-1	-1	1	2	1	2	1	1.5	2	2	0	1	0	1	0	0	1	0.33	0	1	-1
16	2	1	2	2	4	2	3	5	3	0	2	1	2	2	2	2	-2	2	0	0	1	-1	0	2	0	0	1	-2	-0.33	1	1	-1
16	2	2	1	1	4	2	3	3	7	0	0	2	1	2	1	0	1	0	0.5	2	2	0	1	2	0	1	0	0	0.33	2	1	-1
16	2	3	1	1	4	3	2	5	5	2	0	2	0	2	0	2	1	1	1	1	1	-1	0	0	2	0	2	1	1	2	1	-1
16	1	3	3	2	4	0	2	3	5	0	2	1	2	-1	-1	1	-2	1	-0.5	2	2	1	1.5	-1	1	-1	0	2	0.33	-2	2	-1
15	1	1	2	2	4	1	2	1	5	0	2	2	1	2	1	1	2	0	1	2	2	-2	0	1	0	0	1	-1	0	-1	2	-1
17	1	2	2	1	4	2	2	5	5	0	2	2	2	2	1	1	2	0	1	1	1	2	1.5	2	1	2	-1	1	0.67	-1	2	-1
16	1	1	2	2	4	2	2	3	5	0	2	1	1	1	2	2	2	2	2	0	1	2	1.5	1	2	1	-2	2	0.33	0	2	-1
16	1	3	2	1	4	2	2	3	3	2	0	1	1	1	2	1	2	2	2	-2	-2	2	0	2	1	1	2	-1	0.67	2	2	-1
17	1	2	3	3	4	1	1	5	3	0	2	2	2	0	1	2	-1	-2	-1.5	0	0	-1	-0.5	-1	2	1	1	2	1.33	0	-1	0
16	1	2	3	2	4	2	1	7	5	2	0	0	1	0	2	1	-2	2	0	0	1	2	1.5	0	-1	1	1	0	0.67	1	-1	0
16	2	1	2	1	4	0	2	3	1	0	0	0	0	0	0	0	0	0	0	0	0	0	0	0	0	0	0	0	0	0	0	0
17	1	1	3	3	4	1	2	1	3	0	2	1	2	2	2	2	0	1	0.5	1	1	2	1.5	0	1	0	2	0	0.67	0	0	0
16	2	3	2	1	4	1	2	3	5	2	0	2	2	1	1	2	1	1	1	1	1	2	1.5	0	2	1	2	0	1	0	0	0
16	2	2	3	3	4	1	2	3	5	0	0	0	1	0	1	-2	2	1	1.5	2	2	1	1.5	1	1	1	-1	1	0.33	1	0	0
16	1	3	3	2	4	2	2	7	5	0	0	1	0	-1	0	0	1	1	1	0	0	0	0	1	1	0	1	1	0.67	0	1	0
14	1	2	3	3	4	2	2	7	3	0	0	1	1	-1	1	0	2	-1	0.5	1	1	-1	0	-2	1	1	1	1	1	0	1	0
16	1	1	3	3	4	1	1	7	5	0	2	1	1	2	1	1	1	2	1.5	1	2	2	2	2	1	2	1	1	1.33	0	1	0
16	2	3	3	3	4	1	1	3	3	2	2	1	0	0	2	2	2	1	1.5	1	1	0	0.5	1	2	-1	0	0	-0.33	1	2	0
13	1	2	2	1	4	1	1	5	3	2	0	2	0	1	1	2	2	-1	0.5	0	0	2	1	-1	0	1	1	0	0.67	1	2	0
14	2	1	2	2	4	2	1	3	7	0	0	-1	1	2	2	1	1	2	1.5	2	2	1	1.5	1	0	-1	1	2	0.67	2	2	0
17	1	2	3	3	4	2	1	5	5	2	2	1	0	1	2	0	0	2	1	1	1	0	0.5	2	1	2	2	2	2	1	0	1
15	1	1	3	3	4	2	0	1	7	2	0	1	1	0	1	2	2	2	2	2	2	0	1	2	0	1	0	0	0.33	2	0	1
14	1	3	2	2	4	1	2	7	3	2	2	0	2	-1	2	1	2	-2	0	1	1	0	0.5	0	-1	0	0	2	0.67	0	1	1
17	2	2	3	3	4	2	3	3	7	0	0	0	1	1	1	2	1	1	1	0	1	1	1	2	1	2	0	2	1.33	-1	0	2
16	1	2	1	2	4	2	2	7	7	2	0	1	1	1	0	1	-1	2	0.5	0	1	2	1.5	0	0	0	1	1	0.67	1	1	2
15	1	2	3	3	3	3	5	1	5	0	0	-2	-2	2	-2	-2	-2	-2	-2	-2	-2	-2	-2	0	2	-2	-2	-2	-2	-2	-2	-2
13	1	2	3	2	3	3	5	5	3	0	2	1	-1	1	-2	-2	-2	2	0	1	1	1	1	2	0	1	2	2	1.67	-1	-2	-2
13	2	1	3	2	3	2	5	7	3	0	2	0	2	2	0	0	0	2	1	-1	0	0	0	-1	1	0	0	1	0.33	0	-2	-2
14	1	3	2	2	3	1	4	3	3	0	0	1	1	1	-1	-1	2	-1	0.5	1	1	2	1.5	1	0	1	1	1	1	1	-2	-2
16	1	2	3	3	3	2	4	1	3	2	0	2	0	2	0	0	1	-2	-0.5	1	1	1	1	1	1	2	0	-1	0.33	-1	-1	-2
13	1	1	2	1	3	3	3	3	3	0	0	1	1	1	1	2	0	2	1	2	2	1	1.5	-1	2	2	-2	-1	-0.33	0	-1	-2
13	2	2	1	1	3	3	3	5	7	0	2	2	1	-1	0	0	1	1	1	-1	-1	1	0	-1	1	-1	2	-1	0	0	-1	-2
14	2	3	1	1	3	1	3	3	3	0	2	-2	2	0	1	0	1	1	1	1	1	0	0.5	-1	2	1	2	0	1	0	-1	-2
13	1	3	3	2	3	1	3	0	1	0	0	0	2	2	2	2	2	-2	0	0	0	0	0	-1	2	1	0	2	1	0	-1	-2
17	1	4	3	2	3	1	3	3	5	0	2	2	1	2	1	0	0	0	0	2	2	1	1.5	0	2	1	1	2	1.33	0	-1	-2
16	1	2	3	3	3	3	2	3	3	2	2	0	0	1	0	-1	-1	-1	-1	-1	-1	1	0	0	-1	-1	0	0	-0.33	1	-1	-2
13	1	2	3	2	3	3	2	5	3	2	0	2	-1	2	2	0	-1	2	0.5	0	1	1	1	0	2	2	0	1	1	1	-1	-2
15	1	2	3	2	3	1	2	0	5	2	2	1	2	0	2	-1	1	0	0.5	-1	-1	2	0.5	1	2	2	1	-2	0.33	2	-1	-2
13	1	1	2	1	3	1	2	1	3	2	2	1	2	2	0	1	1	1	1	2	2	2	2	1	2	1	1	-1	0.33	-2	0	-2
14	1	1	3	3	3	1	2	7	5	0	0	1	2	0	1	1	2	2	2	-1	0	1	0.5	2	-1	1	1	0	0.67	-2	0	-2
17	1	2	3	3	3	1	2	3	1	2	0	2	1	-1	1	1	1	1	1	0	1	2	1.5	-1	0	1	1	1	1	0	0	-2
14	2	1	2	1	3	2	2	7	5	0	0	0	1	1	1	-2	1	1	1	2	2	0	1	2	1	1	-1	2	0.67	0	0	-2
13	1	3	2	1	3	2	2	1	3	0	2	1	1	-2	0	1	2	2	2	1	2	2	2	0	1	-2	2	-2	-0.67	2	0	-2
16	2	1	2	1	3	2	2	3	1	2	0	2	-2	2	1	-2	-2	-1	-1.5	1	1	0	0.5	2	2	0	-1	1	0	2	0	-2
16	1	2	2	3	3	3	1	1	5	0	2	1	-1	-1	2	0	2	1	1.5	1	1	-2	-0.5	2	0	-1	0	1	0	2	0	-2
15	2	2	3	3	3	4	1	7	1	2	2	1	1	-1	1	1	2	2	2	0	1	1	1	1	2	2	2	2	2	2	0	-2
14	1	3	2	3	3	5	1	1	1	2	0	2	-2	0	1	2	2	0	1	2	2	1	1.5	1	1	1	2	1	1.33	0	1	-2
15	2	1	3	3	3	5	1	5	3	2	2	1	1	1	2	1	1	0	0.5	2	2	2	2	1	-1	2	1	-1	0.67	1	1	-2
15	1	2	3	2	3	5	1	3	7	2	0	1	0	-1	1	0	1	1	1	-1	-1	2	0.5	1	2	1	1	1	1	1	1	-2
17	1	2	3	2	3	1	1	5	5	0	0	-1	-2	-1	-2	-1	-1	-1	-1	-2	-2	-2	-2	-1	-2	-1	-1	-2	-1.33	-1	-2	-1
15	1	1	2	1	3	2	1	5	3	2	2	1	-1	2	1	2	1	2	1.5	2	2	2	2	1	1	0	0	1	0.33	-1	-2	-1
13	1	2	2	2	3	2	1	3	5	0	0	1	2	2	0	1	2	2	2	1	2	2	2	-2	2	0	2	1	1	-1	-2	-1
13	2	2	2	2	3	0	0	0	0	0	0	2	2	-2	1	0	0	0	0	0	0	-1	-0.5	1	1	0	0	0	0	-2	-1	-1
16	2	1	3	3	3	1	4	1	5	0	0	0	0	0	0	0	0	0	0	0	0	0	0	-1	-1	-1	-1	-1	-1	-1	-1	-1
15	1	3	1	1	3	1	4	5	0	0	2	1	1	-1	0	-1	1	1	1	1	1	1	1	1	1	1	-1	-1	-0.33	-1	-1	-1
16	1	4	2	1	3	2	4	3	3	2	2	1	2	0	2	0	-1	-1	-1	0	0	1	0.5	1	1	2	0	0	0.67	-1	-1	-1
17	1	1	3	3	3	0	3	3	1	0	2	0	1	2	1	-1	-1	-1	-1	0	0	1	0.5	2	0	2	2	2	2	-1	-1	-1
13	1	1	3	2	3	1	3	7	5	2	0	1	1	1	2	1	2	1	1.5	-1	0	-1	-0.5	2	1	1	1	0	0.67	0	-1	-1
15	1	1	2	1	3	2	3	3	3	0	0	2	0	1	0	2	2	-2	0	0	0	1	0.5	2	1	2	0	1	1	2	-1	-1
15	1	3	2	1	3	2	3	1	3	0	2	1	1	1	2	2	0	1	0.5	2	2	-2	0	1	1	0	-2	0	-0.67	-1	0	-1
16	1	2	2	1	3	2	3	3	7	0	2	0	-1	1	-1	-1	1	1	1	0	0	1	0.5	2	2	2	2	0	1.33	-1	0	-1
17	1	3	2	3	3	2	3	5	3	0	2	2	2	0	2	2	1	1	1	2	2	1	1.5	0	2	-1	-2	-1	-1.33	0	0	-1
13	1	3	2	1	3	3	2	1	5	0	2	2	-2	2	0	2	2	2	2	1	2	2	2	1	1	0	0	2	0.67	0	0	-1
17	2	3	3	3	3	3	2	7	3	0	2	2	2	-2	0	-2	0	0	0	-1	-1	2	0.5	1	1	2	1	2	1.67	0	0	-1
15	1	3	3	2	3	4	2	3	3	0	0	2	0	2	1	2	2	0	1	2	2	2	2	2	0	0	0	1	0.33	2	0	-1
15	2	1	2	1	3	0	2	7	3	2	0	2	0	-1	2	0	2	1	1.5	0	1	0	0.5	2	2	2	2	2	2	2	0	-1
16	2	3	2	1	3	0	2	7	7	2	0	2	2	0	0	2	1	1	1	2	2	0	1	0	2	0	-1	-1	-0.67	1	1	-1
16	2	2	1	1	3	1	2	5	3	2	0	1	1	1	2	1	2	2	2	1	2	0	1	0	0	-2	0	-1	-1	1	1	-1
14	2	1	2	2	3	1	2	3	3	0	0	2	2	1	2	1	1	0	0.5	1	1	0	0.5	-2	0	2	0	-1	0.33	1	1	-1
16	1	1	2	1	3	2	2	3	5	2	0	-2	0	1	1	-1	0	1	0.5	1	1	2	1.5	1	2	-1	0	0	-0.33	1	1	-1
15	1	2	2	3	3	2	2	3	3	0	0	-1	2	-1	2	1	1	1	1	0	1	2	1.5	2	2	-1	-1	1	-0.33	1	1	-1
16	1	3	3	2	3	3	1	3	3	0	0	2	2	0	1	2	1	0	0.5	1	1	1	1	0	-2	0	0	-1	-0.33	2	1	-1
16	1	1	2	2	3	3	1	7	3	2	0	1	1	2	2	1	2	1	1.5	0	1	2	1.5	-2	2	-1	-1	1	-0.33	2	1	-1
17	2	2	2	2	3	1	1	1	1	2	2	2	1	2	2	2	2	0	1	0	0	1	0.5	0	0	2	0	0	0.67	-1	2	-1
16	2	4	2	3	3	1	1	0	5	2	2	2	1	1	-2	1	-2	1	-0.5	2	2	-1	0.5	0	0	1	0	-1	0	0	2	-1
13	2	1	3	2	3	1	1	5	1	0	0	2	0	0	-2	-1	2	2	2	-1	0	1	0.5	0	0	1	1	1	1	0	2	-1
13	1	3	2	1	3	1	1	7	5	0	0	1	0	1	2	-1	0	2	1	0	1	1	1	0	2	-1	-1	0	-0.67	1	2	-1
17	2	4	2	1	3	1	1	3	5	2	0	0	2	0	0	1	1	1	1	0	0	2	1	2	-1	0	2	0	0.67	1	2	-1
15	1	2	2	3	3	1	1	3	7	2	0	2	0	-2	2	1	0	2	1	1	1	2	1.5	1	-2	1	2	2	1.67	1	2	-1
13	1	3	2	1	3	2	1	5	7	2	0	0	1	0	2	1	2	2	2	0	1	2	1.5	0	2	2	2	0	1.33	2	2	-1
14	1	1	2	1	3	2	1	3	3	2	0	0	0	0	0	0	1	-2	-0.5	1	1	1	1	-1	1	2	0	1	1	2	2	-1
16	2	1	3	2	3	1	0	3	5	2	2	-2	1	2	0	1	-2	0	-1	-1	-1	0	-0.5	0	2	2	-1	1	0.67	-1	-1	0
16	1	1	2	1	3	1	4	1	5	0	0	2	0	2	2	2	-1	2	0.5	1	1	1	1	-2	0	1	1	1	1	-1	-1	0
16	2	3	1	1	3	1	4	3	3	2	2	1	2	2	1	1	-1	1	0	2	2	1	1.5	1	0	2	0	2	1.33	-1	-1	0
14	1	2	2	2	3	2	4	3	1	2	2	0	0	0	0	1	0	0	0	1	1	2	1.5	1	1	1	1	2	1.33	0	-1	0
15	2	1	3	3	3	1	3	0	3	0	0	1	1	0	2	2	1	1	1	1	1	2	1.5	1	1	0	-1	2	0.33	-1	0	0
14	1	2	2	1	3	1	3	5	3	0	2	0	-1	0	0	2	0	-1	-0.5	0	0	1	0.5	-1	0	-1	-1	-1	-1	0	0	0
16	1	1	3	3	3	2	3	3	7	2	0	2	2	2	2	2	2	2	2	2	2	2	2	0	0	0	0	0	0	0	0	0
17	2	1	2	3	3	3	2	7	3	0	0	2	-1	2	1	1	0	2	1	1	1	2	1.5	-1	1	1	2	0	1	0	0	0
14	2	3	1	2	3	3	2	7	1	2	2	2	1	1	1	0	2	2	2	2	2	2	2	2	2	2	2	1	1.67	0	0	0
15	1	2	3	2	3	0	2	5	3	2	2	0	2	0	-2	2	1	1	1	-2	-2	1	-0.5	1	1	0	-2	0	-0.67	1	0	0
13	1	1	2	1	3	1	2	5	3	0	0	2	2	1	2	2	1	2	1.5	2	2	2	2	0	-1	1	2	0	1	1	0	0
16	2	1	2	3	3	1	2	3	3	2	0	1	2	1	2	2	1	1	1	1	1	1	1	2	1	0	1	1	0.67	-1	1	0
13	1	2	2	1	3	1	2	3	3	0	2	0	2	2	1	2	1	0	0.5	0	0	1	0.5	0	2	2	0	-1	0.33	1	1	0
16	1	3	3	3	3	1	2	1	1	0	0	1	2	1	2	1	0	2	1	2	2	2	2	0	-1	1	0	0	0.33	1	1	0
16	2	3	2	2	3	1	2	3	3	2	2	1	2	1	0	2	1	1	1	1	1	0	0.5	0	2	1	0	0	0.33	1	1	0
15	1	2	3	3	3	1	2	3	3	2	0	1	0	1	2	1	2	0	1	2	2	1	1.5	-2	2	0	2	0	0.67	1	1	0
16	2	3	3	2	3	1	2	5	3	0	0	-1	-2	-2	0	-2	-1	0	-0.5	-1	-1	-1	-1	1	0	1	1	1	1	1	1	0
17	1	2	3	3	3	2	2	5	5	2	2	1	-2	1	2	1	2	1	1.5	0	1	2	1.5	2	2	2	-1	-2	-0.33	2	1	0
14	2	1	3	3	3	3	1	5	5	0	0	0	1	2	1	2	0	1	0.5	0	0	2	1	2	0	-1	1	-2	-0.67	2	1	0
16	2	1	3	3	3	1	1	5	3	0	0	2	1	-1	1	0	0	1	0.5	0	0	2	1	0	1	0	1	0	0.33	2	1	0
14	1	1	3	2	3	1	1	5	3	2	0	2	0	0	-1	1	-1	0	-0.5	0	0	1	0.5	2	-2	-2	0	1	-0.33	2	1	0
16	2	2	2	1	3	1	1	5	5	0	0	0	2	0	2	1	0	1	0.5	1	1	1	1	0	-1	1	1	1	1	2	1	0
15	2	2	3	3	3	1	1	3	5	0	2	1	-2	2	2	-1	2	0	1	2	2	-1	0.5	0	2	1	2	2	1.67	2	1	0
13	2	2	2	2	3	1	1	7	7	0	0	1	0	1	1	2	0	0	0	0	0	0	0	2	2	1	0	0	0.33	0	2	0
15	2	1	2	3	3	2	1	1	1	0	2	2	2	1	1	1	2	1	1.5	2	2	2	2	2	1	-1	2	0	0.33	0	2	0
17	1	3	2	2	3	2	1	7	3	0	2	2	2	2	-2	0	1	-1	0	1	1	1	1	0	0	1	0	2	1	-1	0	1
14	2	1	2	2	3	2	1	3	3	2	0	1	2	2	1	1	1	2	1.5	-2	-2	2	0	2	2	2	2	2	2	-1	0	1
13	1	1	3	2	3	2	1	3	7	0	2	-1	2	2	1	2	-2	2	0	2	2	0	1	1	-1	1	0	0	0.33	0	0	1
14	2	3	2	2	3	2	0	7	3	0	0	0	2	2	1	2	-1	2	0.5	2	2	-1	0.5	1	-1	0	2	0	0.67	0	0	1
17	2	2	1	2	3	4	4	7	7	2	2	1	1	-1	1	0	2	2	2	0	1	1	1	1	1	1	2	1	1.33	0	0	1
15	1	2	3	3	3	4	3	5	3	2	0	1	-1	0	0	2	1	0	0.5	1	1	0	0.5	1	-1	2	1	1	1.33	1	0	1
13	1	2	2	1	3	3	2	5	5	2	0	1	2	1	1	0	1	1	1	2	2	2	2	0	1	1	1	0	0.67	2	0	1
14	1	2	2	1	3	4	2	3	5	0	0	1	2	2	1	2	0	2	1	1	1	2	1.5	2	1	2	1	-2	0.33	-1	1	1
17	1	3	3	2	3	2	2	5	3	2	0	1	2	2	2	1	2	0	1	1	1	0	0.5	1	0	1	0	0	0.33	0	1	1
16	1	3	2	2	3	2	2	5	3	2	0	0	0	1	-2	0	1	2	1.5	-1	0	-1	-0.5	1	2	0	0	2	0.67	0	1	1
15	1	2	3	3	3	2	2	7	1	0	2	0	-1	2	1	0	2	1	1.5	-1	0	-1	-0.5	1	-1	0	0	1	0.33	1	1	1
16	2	2	2	1	3	2	2	5	7	0	2	2	2	0	2	1	0	0	0	0	0	0	0	0	1	1	1	1	1	1	1	1
14	1	1	2	1	3	2	2	1	3	0	0	2	1	1	2	1	2	-1	0.5	0	0	-1	-0.5	2	1	1	1	2	1.33	1	1	1
16	1	2	3	3	3	4	1	3	5	2	2	2	2	2	0	0	1	2	1.5	2	2	1	1.5	1	1	2	2	2	2	-1	0	2
13	1	3	2	2	3	1	1	5	0	2	2	0	-2	1	-1	0	2	1	1.5	2	2	0	1	1	0	2	2	1	1.67	-1	1	2
15	1	2	2	1	3	2	1	3	3	2	0	1	2	-2	2	2	2	2	2	2	2	2	2	2	-2	2	2	0	1.33	-2	2	2
15	1	2	3	2	3	2	1	5	3	0	0	0	0	2	0	2	2	1	1.5	0	1	2	1.5	1	-2	2	1	-1	0.67	0	2	2
16	1	2	2	3	3	1	4	0	5	0	0	1	1	1	2	0	0	2	1	1	1	1	1	1	2	1	-2	0	-0.33	0	2	2
16	2	2	1	1	3	3	3	0	3	2	0	-2	2	1	2	-1	1	2	1.5	-2	-2	2	0	1	1	1	-1	-1	-0.33	1	2	2
15	1	3	3	2	3	2	2	3	3	2	2	1	1	2	2	2	1	1	1	1	1	0	0.5	-1	2	-1	-1	2	0	2	2	2
15	1	1	2	1	3	5	1	3	5	0	0	2	2	2	2	2	2	2	2	2	2	2	2	2	2	2	2	2	2	2	2	2
14	2	2	1	1	3	1	1	3	3	0	0	2	2	2	2	2	2	2	2	2	2	2	2	2	2	2	2	2	2	2	2	2
13	1	2	3	2	2	3	3	5	5	2	2	2	2	-2	2	2	2	2	2	0	1	2	1.5	2	-2	2	2	2	2	-2	-2	-2
15	2	2	2	1	2	2	3	5	5	0	2	0	1	2	1	0	1	0	0.5	0	0	2	1	2	0	2	1	1	1.33	-1	-1	-2
15	2	2	2	1	2	2	3	1	3	2	0	0	1	2	1	1	1	2	1.5	1	2	2	2	1	0	0	-1	0	-0.33	0	-1	-2
16	1	2	2	3	2	2	3	7	3	2	2	2	1	1	2	-2	1	1	1	1	1	0	0.5	2	-1	-1	1	0	0	0	-1	-2
17	1	2	3	3	2	3	2	1	5	0	0	-1	1	0	1	0	0	0	0	2	2	-2	0	1	0	1	0	1	0.67	0	-1	-2
13	1	2	2	1	2	3	2	3	3	2	2	0	2	2	1	2	2	1	1.5	2	2	2	2	0	2	1	-1	-1	-0.33	-2	0	-2
15	1	2	3	2	2	3	2	7	3	2	2	0	0	0	0	0	1	0	0.5	0	0	1	0.5	0	0	1	1	1	1	-2	0	-2
17	2	2	2	2	2	5	2	7	3	2	2	1	0	0	0	1	0	0	0	0	0	0	0	-1	1	0	2	1	1	-2	0	-2
17	1	1	3	2	2	1	2	5	3	0	2	2	2	1	2	2	2	2	2	0	1	1	1	1	2	2	2	1	1.67	-2	0	-2
15	1	2	3	3	2	1	2	5	7	2	0	0	0	1	0	2	2	-2	0	-2	-2	1	-0.5	-2	0	0	-1	-1	-0.67	0	0	-2
15	1	2	3	2	2	2	2	5	0	2	0	0	1	2	-1	1	1	2	1.5	0	1	1	1	1	0	-1	1	-2	-0.67	1	0	-2
17	2	1	2	2	2	2	2	7	7	0	0	2	2	0	0	0	1	2	1.5	2	2	-2	0	-1	0	2	2	0	1.33	2	0	-2
14	2	1	3	2	2	3	1	0	1	0	0	2	2	-1	0	2	-1	2	0.5	2	2	1	1.5	-1	2	1	0	1	0.67	0	1	-2
13	2	2	2	1	2	3	1	5	3	2	0	1	1	0	1	1	1	1	1	1	1	1	1	1	1	1	1	0	0.67	1	1	-2
16	1	1	3	3	2	3	1	3	1	2	0	2	2	2	2	2	1	1	1	1	1	1	1	1	1	1	1	1	1	1	1	-2
13	1	3	2	1	2	0	1	5	7	0	2	2	2	-2	2	0	2	1	1.5	-2	-2	2	0	2	2	1	2	1	1.33	1	1	-2
17	1	1	3	2	2	1	1	5	3	0	2	-1	-1	-1	-1	-1	-1	-1	-1	-1	-1	-1	-1	-1	-2	-1	-1	-2	-1.33	-1	-2	-1
15	1	1	3	3	2	1	1	3	3	2	2	-1	0	-1	-1	0	1	0	0.5	0	0	0	0	1	1	0	-1	-1	-0.67	-1	-2	-1
13	2	3	3	2	2	1	1	7	7	2	0	1	0	0	1	2	1	2	1.5	1	2	1	1.5	1	0	1	0	-1	0	-1	-2	-1
13	1	1	2	1	2	1	1	3	5	0	2	2	2	-1	2	2	2	2	2	-2	-2	2	0	0	2	2	2	2	2	-1	-2	-1
15	2	2	2	1	2	1	1	5	7	2	0	0	1	1	1	0	1	2	1.5	1	1	1	1	1	0	1	1	0	0.67	1	-2	-1
13	1	1	3	2	2	2	1	0	0	0	0	1	1	2	1	2	2	2	2	2	2	0	1	0	0	1	0	0	0.33	2	-2	-1
14	1	2	2	1	2	2	1	5	7	0	0	1	-1	1	1	-2	-1	-1	-1	1	1	1	1	0	2	1	0	0	0.33	-2	-1	-1
16	1	1	3	3	2	2	1	1	7	0	2	1	1	-2	0	-1	0	0	0	0	0	0	0	-2	0	0	-1	-1	-0.67	-1	-1	-1
16	2	2	3	2	2	5	0	3	3	2	0	1	1	-1	1	1	1	1	1	0	0	1	0.5	-1	1	1	1	1	1	-1	-1	-1
17	1	1	2	1	2	1	0	3	5	0	0	1	0	0	0	-1	1	-1	0	-1	-1	0	-0.5	-1	0	0	0	0	0	0	-1	-1
14	1	2	2	1	2	3	5	5	3	2	2	1	1	0	0	1	-1	0	-0.5	0	0	1	0.5	-1	0	0	0	0	0	1	-1	-1
16	2	1	3	3	2	2	5	7	3	0	0	2	2	2	2	2	0	0	0	-1	-1	1	0	1	1	0	0	1	0.33	1	-1	-1
16	2	2	3	2	2	3	3	3	3	0	0	1	0	0	1	0	2	0	1	1	1	1	1	0	1	0	2	2	1.33	1	-1	-1
14	1	2	1	1	2	3	3	3	3	0	0	2	2	2	0	0	2	2	2	1	2	2	2	-1	2	0	1	2	1	2	-1	-1
14	2	1	1	1	2	1	3	7	7	2	2	2	2	1	2	2	2	2	2	-2	-2	2	0	1	2	2	2	2	2	2	-1	-1
16	2	3	1	1	2	3	2	3	1	2	2	1	0	1	0	1	0	0	0	1	1	0	0.5	0	-1	0	-1	0	-0.33	-1	0	-1
15	2	1	1	1	2	3	2	7	3	0	0	2	1	-2	1	2	1	1	1	2	2	1	1.5	0	-2	0	1	1	0.67	0	0	-1
16	1	2	3	3	2	3	2	7	3	0	2	1	1	1	2	1	2	2	2	-1	0	-2	-1	2	0	2	0	2	1.33	0	0	-1
13	1	1	3	2	2	4	2	3	3	2	2	1	0	-2	1	2	2	2	2	0	1	2	1.5	2	0	2	2	2	2	0	0	-1
13	1	2	3	2	2	5	2	3	3	0	0	1	0	1	-1	-1	-1	-1	-1	-1	-1	0	-0.5	0	0	1	1	-1	0.33	1	0	-1
13	1	1	2	2	2	5	2	5	3	2	0	2	0	1	2	-2	2	0	1	-2	-2	0	-1	2	1	-1	-1	1	-0.33	1	0	-1
14	2	2	3	2	2	0	2	0	3	2	2	2	0	2	2	0	2	2	2	0	1	-1	0	-2	-2	-1	0	1	0	0	1	-1
15	2	2	2	3	2	1	2	7	5	0	2	2	1	1	1	0	1	1	1	1	1	1	1	0	-1	1	1	-1	0.33	1	1	-1
15	1	1	2	1	2	1	2	5	7	0	2	1	1	0	1	0	2	2	2	2	2	1	1.5	-1	2	1	2	-1	0.67	1	1	-1
13	2	3	3	2	2	1	2	5	5	0	0	2	2	-1	1	1	2	2	2	2	2	1	1.5	1	0	2	1	1	1.33	2	1	-1
15	1	2	2	1	2	1	2	7	3	0	0	2	2	1	2	1	0	0	0	0	0	1	0.5	1	1	-2	1	0	-0.33	-1	2	-1
15	1	3	2	2	2	2	2	3	1	0	0	2	1	1	0	-2	1	0	0.5	2	2	1	1.5	2	-1	2	1	1	1.33	-1	2	-1
15	1	2	3	3	2	2	2	3	3	2	0	0	2	-2	2	0	1	-1	0	2	2	2	2	1	0	-1	1	0	0	0	2	-1
15	2	2	3	3	2	2	2	7	1	0	0	0	2	0	1	1	0	2	1	1	1	2	1.5	2	1	-1	2	-1	0	1	2	-1
13	1	2	2	2	2	2	2	7	3	2	0	1	2	1	1	2	1	1	1	1	1	2	1.5	2	1	-2	-1	1	-0.67	2	2	-1
17	2	2	1	2	2	2	2	5	5	2	2	2	2	1	2	0	1	1	1	0	0	0	0	1	1	0	1	1	0.67	-2	2	-1
15	2	1	2	3	2	2	2	7	3	0	2	2	2	-2	2	2	2	2	2	1	2	2	2	2	2	1	1	1	1	-1	-1	0
17	1	1	2	3	2	3	1	7	5	2	0	2	1	-1	1	1	1	2	1.5	-2	-2	2	0	1	1	1	1	2	1.33	-1	-1	0
17	2	2	2	2	2	3	1	7	3	0	0	2	-1	2	0	-1	0	0	0	-1	-1	1	0	0	1	0	-1	1	0	1	-1	0
14	2	4	2	1	2	4	1	5	5	0	2	1	1	1	1	2	2	2	2	2	2	0	1	0	-1	0	-1	-1	-0.67	2	-1	0
13	1	1	3	2	2	1	1	5	5	0	0	1	1	0	2	2	1	1	1	1	1	2	1.5	-2	2	0	1	1	0.67	-2	0	0
15	1	2	1	2	2	1	1	3	3	0	2	2	0	1	-1	1	2	1	1.5	2	2	1	1.5	2	1	0	0	-2	-0.67	0	0	0
14	2	2	3	2	2	1	1	3	1	2	2	1	1	0	2	0	1	1	1	1	1	1	1	-1	1	1	-1	-1	-0.33	0	0	0
14	1	2	3	2	2	1	1	7	5	0	2	1	0	0	0	0	-2	-1	-1.5	-1	-2	-1	-1.5	0	0	0	0	-1	-0.33	0	0	0
17	1	1	3	2	2	2	1	1	1	2	2	-1	-1	-1	-1	-1	-1	-1	-1	-1	-1	-1	-1	-1	-1	-1	-1	0	-0.67	0	0	0
17	2	2	3	2	2	2	1	5	7	2	2	0	0	0	0	0	0	0	0	0	0	0	0	0	0	0	0	0	0	0	0	0
16	2	2	3	2	2	2	1	3	0	0	0	2	1	0	2	2	2	1	1.5	2	2	1	1.5	2	0	2	0	0	0.67	0	0	0
15	1	2	3	3	2	2	0	3	3	2	0	1	1	1	-2	1	0	1	0.5	1	1	1	1	0	2	0	2	0	0.67	0	0	0
16	1	2	2	3	2	5	5	7	7	0	2	-2	1	2	2	2	2	1	1.5	1	1	0	0.5	2	0	0	0	1	0.33	0	0	0
17	2	3	3	2	2	2	5	3	3	0	0	1	1	0	1	1	1	1	1	1	1	1	1	0	-1	0	1	2	1	0	0	0
16	1	1	3	2	2	2	3	3	3	0	0	2	2	-2	2	0	0	0	0	0	0	1	0.5	1	2	2	2	2	2	0	0	0
14	2	4	2	1	2	3	2	5	3	0	0	1	0	-1	0	-1	1	1	1	-1	-1	1	0	0	1	0	0	1	0.33	1	0	0
16	2	2	2	2	2	3	2	0	7	0	2	2	0	2	0	2	2	1	1.5	0	1	1	1	1	1	0	0	1	0.33	1	0	0
13	2	3	3	2	2	3	2	7	3	2	2	1	-2	1	1	1	2	2	2	-2	-2	0	-1	-2	1	2	2	-1	1	2	0	0
17	2	2	3	3	2	1	2	5	3	2	0	2	1	2	1	1	2	1	1.5	2	2	2	2	0	1	1	2	0	1	-1	1	0
14	2	3	2	2	2	2	2	5	3	2	2	2	2	2	2	1	1	1	1	0	1	1	1	0	0	-1	1	-1	-0.33	0	1	0
16	1	1	2	2	2	2	2	5	3	2	0	0	1	0	-1	0	1	0	0.5	-1	-1	1	0	1	0	0	1	0	0.33	0	1	0
16	2	2	2	2	2	2	2	7	3	0	2	2	1	1	2	1	-2	-2	-2	-1	-2	0	-1	2	-1	1	0	0	0.33	1	1	0
13	1	2	2	2	2	2	2	0	7	0	2	2	1	2	1	1	1	2	1.5	1	2	2	2	1	2	1	0	1	0.67	1	1	0
17	1	2	3	2	2	1	1	5	3	0	0	2	0	2	1	0	0	1	0.5	2	2	0	1	2	-1	0	1	0	0.33	2	1	0
13	2	3	1	1	2	1	1	5	1	2	0	2	1	2	0	1	2	1	1.5	1	1	0	0.5	2	-1	-1	2	0	0.33	2	1	0
16	2	2	1	2	2	1	1	5	3	0	0	1	2	1	2	0	2	1	1.5	1	1	2	1.5	0	1	0	1	1	0.67	2	1	0
15	2	3	1	1	2	1	1	3	5	2	0	-2	0	-1	0	2	0	1	0.5	1	1	1	1	1	1	2	2	1	1.67	-1	2	0
16	2	2	2	1	2	2	1	7	7	0	0	1	1	1	1	2	0	2	1	1	1	1	1	1	1	0	0	2	0.67	0	2	0
13	1	3	1	1	2	2	1	7	3	0	2	-1	2	-2	0	1	1	2	1.5	2	2	1	1.5	-1	-1	0	0	0	0	1	2	0
15	2	3	2	3	2	2	1	5	3	0	2	0	1	1	2	2	1	2	1.5	1	2	2	2	1	0	1	0	0	0.33	1	2	0
17	2	2	2	3	2	2	1	5	3	0	2	1	2	1	1	0	2	2	2	2	2	0	1	0	-1	1	1	1	1	-1	0	1
14	2	1	2	1	2	2	1	3	1	0	0	1	1	1	1	1	2	-1	0.5	1	1	2	1.5	0	0	2	-2	-2	-0.67	0	0	1
13	2	1	1	1	2	2	1	0	3	0	2	1	0	1	0	-1	1	-2	-0.5	2	2	2	2	1	1	0	0	1	0.33	0	0	1
16	2	2	2	2	2	2	1	7	3	0	2	1	1	2	1	1	2	1	1.5	2	2	1	1.5	2	0	-1	0	0	-0.33	1	0	1
17	2	1	3	2	2	1	0	7	0	0	2	1	1	2	2	2	2	1	1.5	1	1	-2	-0.5	-1	0	1	0	0	0.33	1	0	1
16	1	1	3	3	2	1	0	3	0	2	0	1	1	-1	-2	-2	2	2	2	1	2	1	1.5	0	2	2	0	0	0.67	1	0	1
14	1	2	2	1	2	2	0	3	0	2	2	2	2	0	2	2	2	2	2	0	1	2	1.5	-1	2	2	2	2	2	1	0	1
17	1	1	1	1	2	2	4	5	1	2	2	1	2	-2	2	2	0	1	0.5	1	1	2	1.5	2	2	2	2	2	2	1	0	1
16	2	2	3	3	2	0	3	7	5	0	0	2	2	-2	2	2	2	2	2	2	2	2	2	2	2	2	1	1	1.33	2	0	1
13	2	1	2	2	2	3	2	7	5	0	2	-1	2	1	2	2	0	1	0.5	2	2	2	2	2	1	-2	1	2	0.33	2	0	1
17	1	2	2	2	2	4	2	5	7	0	0	1	2	2	1	2	2	1	1.5	0	1	2	1.5	1	2	0	-1	1	0	0	1	1
15	2	2	2	1	2	5	2	7	3	2	0	2	2	-1	1	1	1	1	1	2	2	-2	0	1	1	-2	1	1	0	0	1	1
13	1	4	1	1	2	1	2	1	1	0	0	1	1	-1	1	1	1	1	1	0	0	1	0.5	1	1	1	0	1	0.67	1	1	1
14	1	2	2	1	2	2	2	1	3	0	2	-1	-1	-1	-1	-1	0	0	0	0	0	-1	-0.5	-1	-1	1	1	1	1	1	1	1
15	2	1	2	3	2	2	2	7	3	0	0	0	0	-1	-1	0	-1	-1	-1	0	0	-1	-0.5	1	1	1	1	1	1	1	1	1
16	2	1	2	2	2	1	1	3	3	0	2	-1	-1	-1	-1	-1	1	1	1	0	0	1	0.5	1	1	1	1	1	1	1	1	1
15	2	2	2	3	2	1	1	3	3	0	2	1	1	-1	1	1	1	2	1.5	1	1	1	1	1	1	1	1	1	1	1	1	1
15	1	2	3	2	2	1	1	5	3	0	2	2	0	-2	0	0	1	1	1	1	1	1	1	2	1	2	1	1	1.33	1	1	1
13	2	2	1	1	2	1	1	3	3	0	2	-1	-2	0	-2	0	-2	-2	-2	-1	-2	-2	-2	0	0	1	1	2	1.33	1	1	1
15	1	3	3	3	2	2	1	3	1	2	2	2	2	-2	2	2	2	2	2	-2	-2	2	0	2	2	2	2	2	2	-2	0	2
17	2	2	2	1	2	2	1	7	3	2	0	2	1	1	-1	-2	1	1	1	2	2	2	2	-1	2	1	0	0	0.33	0	1	2
16	2	1	3	3	2	3	3	5	3	0	2	-1	2	0	1	0	-2	-2	-2	0	0	-1	-0.5	0	-2	0	-2	0	-0.67	2	1	2
16	2	2	3	3	2	1	1	3	0	2	0	2	-2	1	1	2	2	-1	0.5	-1	-1	1	0	1	2	0	-1	-1	-0.67	1	2	2
16	2	1	1	1	2	1	1	3	5	0	0	2	2	-2	2	1	0	2	1	2	2	1	1.5	-1	0	0	0	1	0.33	1	2	2
15	2	3	1	1	2	1	1	3	5	0	0	2	2	-2	2	2	2	2	2	2	2	2	2	-2	2	2	-1	0	0.33	2	2	2
17	1	2	3	3	2	1	1	3	1	0	0	1	2	-2	2	1	2	2	2	1	2	2	2	2	2	1	2	2	1.67	2	2	2
16	2	1	1	2	2	1	1	7	3	2	0	2	2	-2	2	2	1	1	1	-1	-1	0	-0.5	1	2	2	2	2	2	2	2	2
15	2	2	3	3	2	2	1	7	7	2	2	2	2	-2	2	2	2	2	2	2	2	2	2	1	2	2	2	2	2	2	2	2
16	1	1	2	2	2	2	0	7	0	2	2	2	2	2	2	2	1	1	1	1	1	1	1	2	2	2	2	2	2	2	2	2
16	2	1	3	2	2	2	0	1	0	0	0	2	2	2	2	2	1	1	1	-2	-2	2	0	2	2	2	2	2	2	2	2	2
15	2	3	2	1	1	4	4	3	5	0	0	2	2	2	2	2	2	2	2	2	2	2	2	2	2	2	2	2	2	-2	-2	-2
15	1	1	3	3	1	3	3	5	3	0	0	1	0	1	2	0	2	2	2	-1	0	-1	-0.5	1	1	-1	1	2	0.67	-2	-1	-2
16	2	2	1	1	1	1	1	3	3	0	0	2	-1	2	2	1	1	2	1.5	1	2	2	2	-2	2	0	1	0	0.33	0	-1	-2
17	2	1	2	1	1	1	1	3	1	0	0	-2	0	0	1	2	0	2	1	1	1	0	0.5	-1	1	-1	-1	2	0	2	-1	-2
15	1	2	2	1	1	2	1	7	0	2	2	1	0	-2	-2	1	1	0	0.5	2	2	1	1.5	1	0	0	1	0	0.33	-2	0	-2
13	2	3	1	1	1	2	1	3	1	0	0	2	0	-2	1	1	2	1	1.5	1	1	2	1.5	2	-1	0	2	2	1.33	0	0	-2
13	2	2	2	2	1	2	1	7	3	0	2	0	0	0	0	0	1	0	0.5	-1	-1	-1	-1	1	1	1	1	0	0.67	1	1	-2
16	2	2	2	3	1	1	3	5	3	2	2	1	1	1	1	1	1	1	1	1	1	1	1	1	1	1	1	1	1	1	1	-2
16	2	2	3	3	1	3	2	5	5	0	2	0	-1	1	0	-1	-1	0	-0.5	0	0	0	0	0	1	1	0	0	0.33	-1	-2	-1
16	1	1	3	2	1	1	2	5	5	2	0	1	0	-1	1	0	2	2	2	-1	0	2	1	2	2	2	2	2	2	-2	-1	-1
17	1	1	3	2	1	2	2	7	0	0	0	2	0	0	-1	-1	-1	-1	-1	-1	-1	0	-0.5	-1	0	2	0	0	0.67	1	-1	-1
17	2	1	3	3	1	2	2	3	1	2	0	2	1	2	2	1	2	-1	0.5	2	2	-2	0	1	1	2	2	-2	0.67	0	1	-1
17	2	2	2	2	1	2	2	5	3	2	0	1	2	2	2	2	1	2	1.5	2	2	1	1.5	-1	-2	0	1	1	0.67	-1	-1	0
16	1	3	1	1	1	3	1	3	7	2	2	1	1	1	0	0	2	2	2	0	1	1	1	0	1	2	1	1	1.33	0	0	0
15	2	2	2	2	1	2	1	7	3	0	2	2	2	-2	2	2	1	1	1	0	1	2	1.5	1	1	1	1	1	1	1	0	0
14	2	2	3	2	1	1	5	3	5	2	2	2	2	-1	2	2	1	1	1	1	1	1	1	0	2	1	2	2	1.67	1	0	0
16	2	1	2	1	1	1	2	5	3	0	0	2	2	-2	2	2	1	1	1	1	1	1	1	0	2	2	2	2	2	1	0	0
17	1	2	2	3	1	1	1	5	3	2	0	2	1	0	0	1	0	0	0	-2	-2	1	-0.5	2	2	1	1	1	1	2	1	0
13	2	2	3	2	1	1	1	5	3	0	0	2	-2	0	2	0	0	1	0.5	1	1	1	1	2	-1	0	1	-1	0	0	2	0
13	2	2	2	2	1	1	1	3	3	2	2	1	0	0	-1	2	-1	1	0	2	2	-2	0	0	-1	2	1	1	1.33	0	0	1
17	1	1	2	2	1	1	1	1	1	2	2	-1	2	0	0	2	0	1	0.5	2	2	-2	0	-1	0	-1	1	0	0	1	0	1
17	2	1	3	3	1	2	1	7	7	2	0	0	-1	1	0	0	1	0	0.5	0	0	0	0	0	1	1	1	1	1	1	0	1
16	2	2	1	1	1	2	2	3	5	2	0	2	2	1	1	1	0	0	0	0	0	0	0	1	1	1	1	1	1	1	1	1
15	2	2	3	3	1	2	2	7	1	0	2	2	2	2	0	0	2	2	2	0	1	0	0.5	1	-1	0	-1	2	0.33	0	1	2
16	2	1	2	3	1	2	2	5	5	0	0	2	1	2	2	0	2	2	2	2	2	2	2	2	2	2	2	2	2	2	1	2
16	1	3	3	2	1	2	1	7	1	0	0	0	0	1	0	2	0	0	0	0	0	-2	-1	0	1	1	-2	-1	-0.67	1	2	2
16	1	1	3	2	1	2	2	7	5	2	0	1	2	1	2	1	1	1	1	1	1	1	1	1	2	1	1	1	1	1	2	2
